1 **Context-dependent dynamics lead to the assembly of functionally distinct pitcher-plant**  
2 **microbiomes**

3

4

5 Leonora S. Bittleston<sup>1</sup>, Matti Gralka<sup>1</sup>, Gabriel E. Leventhal<sup>1</sup>, Itzhak Mizrahi<sup>2</sup>, Otto X. Cordero<sup>1, †</sup>

6

7 <sup>1</sup> Department of Civil and Environmental Engineering, Massachusetts Institute of Technology

8 (MIT), Cambridge, MA, U.S.A

9 <sup>2</sup> Department of Life Sciences and the National Institute for Biotechnology in the Negev, Ben-

10 Gurion University of the Negev, Israel

11

12 †[ottox@mit.edu](mailto:ottox@mit.edu)

13

14

15 **Abstract**

16 Niche construction through interspecific interactions can condition future community  
17 states on past ones. However, the extent to which such history dependency can steer  
18 communities towards functionally different states remains a subject of active debate. Using  
19 bacterial communities collected from wild pitchers of the carnivorous pitcher plant, *Sarracenia*  
20 *purpurea*, we tested the effects of history on composition and function across communities  
21 assembled in synthetic pitcher plant microcosms. We found that the diversity of assembled  
22 communities was determined by the diversity of the system at early, pre-assembly stages.  
23 Species composition was also contingent on early community states, not only because of  
24 differences in the species pool, but also because the same species had different dynamics in  
25 different community contexts. Importantly, compositional differences were proportional to  
26 differences in function, as profiles of resource use were strongly correlated with composition,  
27 despite convergence in respiration rates. Early differences in community structure can thus  
28 propagate to mature communities, conditioning their functional repertoire.

29

30 **Key words:** alternative states, microbial community assembly, historical contingency, *in vitro*  
31 microcosm

32

## 33 **Introduction**

34           Microbes profoundly shape our ecosystems, yet we still lack a clear understanding of the  
35 processes driving community assembly and related ecosystem functioning<sup>1</sup>. Community  
36 assembly is difficult to predict because the dynamics of any particular species can be dependent  
37 on the community context; niches are created or destroyed through biotic interactions with other  
38 members of an assembling community<sup>2-4</sup>. Microbial communities are complex, with many  
39 species and different kinds of interactions among species. For example, microbes can facilitate  
40 other species' growth via excretion of metabolic waste products<sup>5-8</sup>, or actively interfere with  
41 their growth through the production antimicrobial compounds<sup>9</sup>. Microbes can also engage in  
42 strong cooperative interactions, whereby energy transducing metabolic interactions are coupled  
43 across species<sup>10</sup>. This diversity of interactions creates many potential contexts for species  
44 dynamics, implying that the behavior of one species is dependent on the background of  
45 interactions. Stochastic changes in the biotic context—for example, priority effects and random  
46 colonization or extinction events—can have long-lasting consequences for community structure<sup>3</sup>.  
47 As a result, microbial communities can reach different compositional states due to variation in  
48 biotic context in addition to variation in abiotic environmental conditions such as weather events  
49 or resource pulses. These history-dependent effects are collectively called “historical  
50 contingencies”<sup>2-4</sup>.

51           The extent to which historical contingency leads to alternative community states<sup>2,11</sup>  
52 remains an active subject of debate. In a strongly selective environment historical contingencies  
53 may not matter such that communities converge to the same compositional and functional  
54 outcomes<sup>12</sup>. For example, bacterial communities from widely different sources converged  
55 reproducibly in single-carbon source synthetic media<sup>7</sup>. Beyond microbes, Mediterranean plant

56 communities in environments with frequent fires were formed by related groups of species that  
57 share key traits<sup>13</sup>. In contrast, other studies have found that historical contingency leads to  
58 different community compositions and functions, for example: priority effects led to large  
59 differences in ecosystem function for wood-decaying fungi<sup>14</sup> and productivity of grassland  
60 plants<sup>15</sup>. A third, and perhaps largest, set of studies has found convergence in terms of function  
61 but not species (or phylogenetic) composition, for example: grassland plants<sup>16</sup>, the stratified  
62 layers of a hypersaline microbial mat<sup>17</sup>, microbial communities colonizing the surface of  
63 seaweed<sup>18</sup>, and the bacteria and archaea living in bromeliad tanks<sup>19</sup>.

64         Functional convergence without species convergence is more likely when the functions  
65 being measured are performed by many species from different lineages, and thus are redundant  
66 within the broader species pool. Here, again, there are contrasting reports in the literature on the  
67 prevalence of functional redundancy. A number of studies have found functional redundancy in  
68 microbial communities<sup>19,20</sup>, while others emphasize important functional differences that depend  
69 on species composition<sup>21</sup>. The degree of redundancy is clearly related to the function and system  
70 examined; for example, aerobic respiration is found across many bacteria, while the ability to  
71 degrade lignin is rare. Thus, ‘narrow’ functions, such as the hydrolysis of complex carbon  
72 compounds, are generally carried out by rare community members<sup>22</sup>. When relevant functions  
73 are variable across genetic backgrounds (not highly redundant) and dependent on interactions,  
74 historical contingencies could have major effects on the functional capabilities of a community  
75 and on nutrient cycling within ecosystems<sup>14</sup>. Therefore, studies in microbial ecology need to  
76 address more specific, relevant functional measurements and examine not just on historically  
77 contingent *compositional* states, but also historically contingent *functional* states.

78           The modified leaves of carnivorous pitcher plants host small ecosystems composed of  
79 bacteria, fungi, protozoa, rotifers and arthropods<sup>23,24</sup> and present an excellent system to  
80 investigate the role of historical contingency on function and composition. Bacteria, in particular,  
81 are thought to assist their pitcher plant hosts in breaking down captured prey<sup>25-28</sup>, creating a clear  
82 link between a relevant ecosystem function, the degradation of insect material, and the microbial  
83 species composition. Using bacterial communities from ten wild pitchers of the purple pitcher  
84 plant, *Sarracenia purpurea*, we tested to what extent historical contingencies would impact  
85 community assembly and substrate degradation. To this end, we transferred the communities  
86 from living pitcher plants into *in vitro* microcosms and performed a community assembly  
87 experiment, whereby communities are serially passaged until a stable composition is reached.  
88 During this assembly process, microcosms can converge or remain distinct due to differences in  
89 the initial species pool as well as to differences in biotic interactions across the microcosms. By  
90 comparing the assembly dynamics of ten different plant microbiomes we asked to what extent  
91 communities converge to a single compositional and functional state, and whether any lack of  
92 convergence could be explained by historical contingency.

93

## 94 **Results**

### 95 **Distinct, stable communities assemble in microcosms**

96           The aquatic communities from 10 individual *Sarracenia purpurea* pitchers were filtered  
97 to focus on bacteria and inoculated into a realistic, complex nutrient source: sterilized, ground  
98 crickets in acidified water. The *in vitro* communities were serially transferred every three days  
99 for 21 transfers, using a low dilution rate of one-part culture to one-part fresh media. Community  
100 composition was measured for each transfer using 16S rRNA sequencing (see Methods). From

101 ~8 million sequences across all microcosms and timepoints, DADA2 analysis inferred 889  
102 distinct ASVs (Amplicon Sequence Variants, which we treat as units of diversity). The most  
103 abundant phylum was Proteobacteria, followed by Firmicutes and Bacteroidetes. The top twenty  
104 ASVs are displayed in Figure 1a, accounting for 69.4% of the reads; for ASVs without assigned  
105 genera, genus names were recovered from the full 16S rRNA genes of our cultured strains that  
106 matched 100% with ASV sequences. The most abundant genera (*Aquitalea*, *Pseudomonas*,  
107 *Achromobacter*, *Comamonas* and *Delftia*), all contain bacterial species known to live in  
108 freshwater, soil, or plant-associated habitats<sup>29–33</sup>. Using DNA concentrations as a proxy to  
109 measure biomass increase, we found that there is a ~10-fold increase in biomass during in-vitro  
110 assembly (Figure 1a). Microcosms M03 and M09 stood out as those with the highest biomass  
111 yield as well as having the lowest diversity.

112         The community assembly dynamics were dominated by both ASV loss and dramatic  
113 changes in ASV abundances. We assessed coarse-grained dynamics using the Bray-Curtis  
114 dissimilarity between subsequent time points, which exhibited two seemingly distinct phases  
115 (Figures 1b and 1c): a first phase of rapid change, where many species went extinct and the  
116 survivors increased in frequency; and a second phase of slow changes that started after 7  
117 transfers (21 days, indicated by the thin line in Figure 1c), in which extinctions were rare and  
118 likely caused by competitive interactions. In this last phase, communities slowly approached  
119 what seemed to be an equilibrium state (Figure 1b and 1c). However, the near-equilibrated  
120 communities maintained significant differences both in terms of composition and diversity. For  
121 example, no microcosm had the same top three ASVs (Figure 1a), the NMDS ordination showed  
122 generally non-overlapping points for the different microcosms (Figure 1b), and, even after Day  
123 21 the effective number of species (see Methods for calculation) still differed among the

124 microcosm communities, ranging from about 6 to 16 (small colored numbers in Figure 1b). In  
 125 summary, communities tended to first converge due to the fast loss of diversity (primarily along  
 126 the first NMDS axis), but remain distinct due to historical contingencies (primarily along the  
 127 second NMDS axis).

128

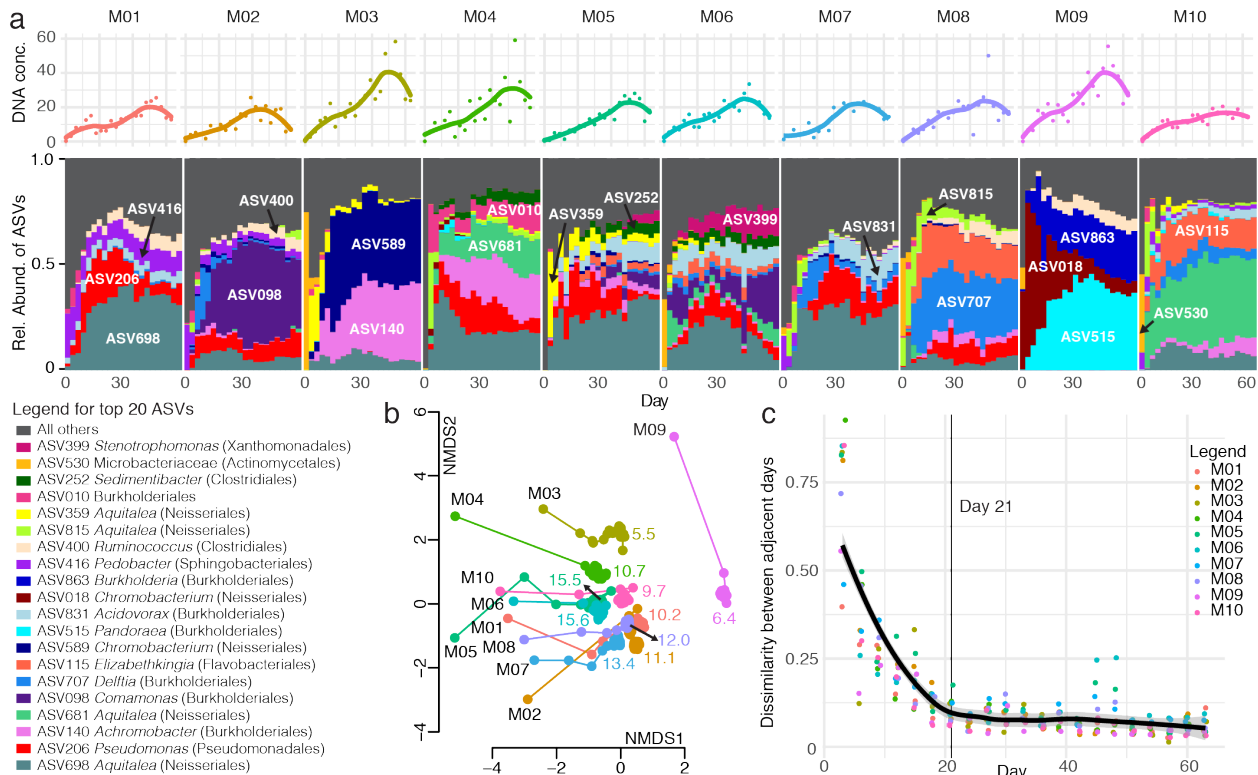

**Figure 1.** Microcosm communities approach distinct equilibria. a) Relative abundances of the top 20 ASVs across the ten microcosms during the course of the serial transfer experiment. ASVs are listed one time each on the bar plot, with taxonomic classification in the legend. The DNA concentrations for each timepoint are graphed above as points, with a Loess fit as a solid line. b) Communities change quickly and then stabilize in the Non-metric Multidimensional Scaling (NMDS) plot of Bray-Curtis dissimilarities of the microcosm community compositions. The microcosm name is listed in black next to the Day 0 community of each microcosm, and the lines connect the timepoints. Colored numbers indicate the mean effective number of species for each community post-Day 21. c) The Bray-Curtis dissimilarity of ASV relative abundances between adjacent days decreases over the course of the experiment. The thick black line shows a Loess fit to all data points, and the thin line marks Day 21.

129 Interestingly, the differences in richness near-equilibrium were seemingly pre-determined  
130 at early stages of assembly. Communities lost many ASVs between days 0-3 during initial  
131 adjustment to the laboratory environment (Figure 2a), but the richness measured from the first  
132 timepoint of the experiment (Day 3) was an excellent predictor of the richness at the end of the  
133 experiment (Day 63) with  $R^2 = 0.9008$  and  $p < 0.0001$  (Figure 2b). Notably, richness in samples  
134 taken directly from the pitcher plant (Day 0) had no significant correlation with that of Day 63  
135 ( $R^2 = 0.1978$ ,  $p = 0.1105$ ), consistent with the notion that some ASVs in the pitcher plant fluid  
136 that were either metabolically inactive or unable to grow in our experimental conditions. Thus,  
137 changes in community composition after only three days of adjusting to the lab environment  
138 propagated throughout the assembly process, suggesting that historical contingencies played a  
139 significant role in structuring communities.

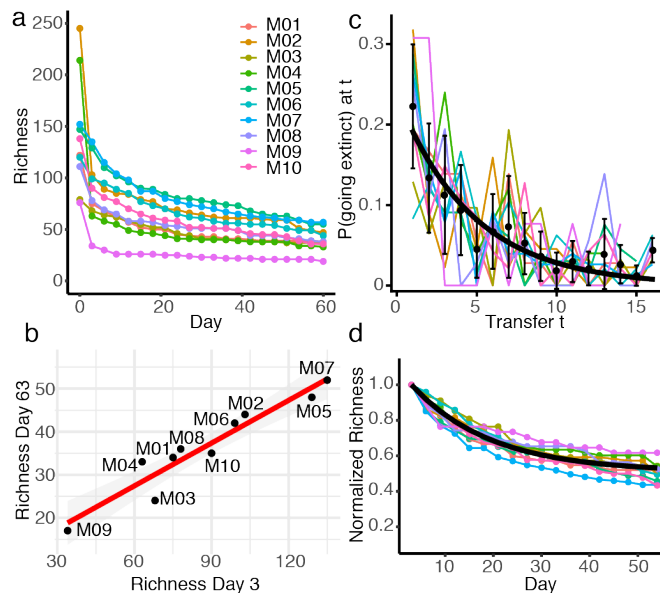

**Figure 2.** Early richness predicts final richness and communities equilibrate at a common rate. a) Richness over time for each microcosm community. b) Richness on Day 3 (1<sup>st</sup> timepoint) is strongly correlated with richness on Day 63 (21<sup>st</sup> timepoint). Linear model:  $R^2 = 0.9008$ ,  $p < 0.0001$ . c) The probability of going extinct at transfer  $t$ . Colored lines are probability densities for individual microcosms. Black points are averages across microcosms, the black line is the maximum likelihood distribution with a common parameter across microcosms (see main text and Methods) given by the inverse mean extinction time. d) Richness over time for each microcosm community, normalized by

the richness on Day 3. The black line shows the exponential decay curve parametrized by the mean proportion of surviving ASVs (from panel b) and the common ASV extinction rate (from panel c).

140  
141 Given the strong correlation between initial and final richness, we wondered whether  
142 temporal dynamics of community equilibration were also correlated across microcosms. For



143 example, the temporal dynamics of ASV loss could be driven by external factors such as transfer  
144 intervals and the dilution factor, in which case all microcosms should exhibit comparable  
145 dynamics. Alternatively, the dynamics might be driven by community context and thus specific  
146 to each microcosm. To answer this question, we measured the distribution of ASV extinction  
147 times across the microcosm communities (Fig. 2c). As a null model, we tested if the loss of  
148 ASVs is a random process where each ASV that is bound to go extinct in a given community  
149 context does so with a fixed probability  $p$  in each transfer. This assumption implies that the  
150 extinction time distribution is described by a geometric distribution, which indeed gave a good  
151 fit for all microcosms (Pearson's chi-squared test for differences was not significant:  $p > 0.05$  in  
152 all cases). To investigate if microcosms can be described by a common extinction time  
153 distribution, we used the Akaike Information Criterion to compare two models: using either one  
154 parameter per microcosm or a single parameter describing all microcosms. Surprisingly, the  
155 single-parameter model was strongly favored (relative likelihood of  $\sim 1000$ ) suggesting that  
156 temporal dynamics of ASV extinction in our communities are the same and likely driven by  
157 external factors rather than biotic context. This 'universal' dynamic of species loss is also  
158 revealed when studying relative richness, i.e. normalized by richness at Day 3 (Figure 2d). After  
159 this normalization, all relative richness curves mapped well to our model's maximum likelihood  
160 distribution and approached a common equilibrium relative richness level (approximately  $\sim 50\%$   
161 of the initial richness, regardless of its absolute value, Figure 2d). Thus, about half of all initial  
162 ASVs were doomed to go extinct at a random point during the assembly process, while the rest  
163 persisted indefinitely.

164 We investigated if community context influenced the dynamics of individual ASVs.  
165 Although the ten microcosms reached different compositional states, on average  $\sim 90\%$  of the

166 communities were composed of ASVs that occurred in more than one microcosm  
167 (Supplementary Figure S1), and this overlap allowed us to ask to what extent the same species  
168 behave similarly or not when their community context changes. To this end, we first looked at  
169 the extinction times and found that the majority of the shared ASVs dropped out of different  
170 microcosms at different times (Figure 3a), often with large differences in their persistence time.  
171 For example, ASV681 (in Figure 3b) dropped out by Day 12 in microcosm M08, but persisted at  
172 high relative abundance through the end of the experiment in microcosms M04, M06 and M10.  
173 We focused on ASVs that persisted at least once past the 7<sup>th</sup> transfer (Day 21) and found that  
174 although the same ASV can act differently in different community contexts (Figure 3b), the  
175 temporal trajectories of the same ASVs in different microcosms tended to be somewhat more  
176 correlated with each other than randomly chosen ASVs (Fig. 3c). This result implies that, as one  
177 might expect, species identity determines species abundance dynamics in different biotic  
178 contexts to some degree. However, only 55% of these ASVs had significantly correlated  
179 abundance trajectories in at least two microcosms and only 3% were significantly correlated  
180 across all their microcosms (Fig. 3d, see Methods for details). Furthermore, shared ASVs did not  
181 always have the same fate: about 80% of ASVs present in two microcosms either dropped out or  
182 persisted in in both, and about 50% of ASVs in 6 microcosms had the same fate in all cases (Fig.  
183 3e). These results indicate that in most cases biotic context and interactions with other  
184 community members shaped ASV dynamics.  
185

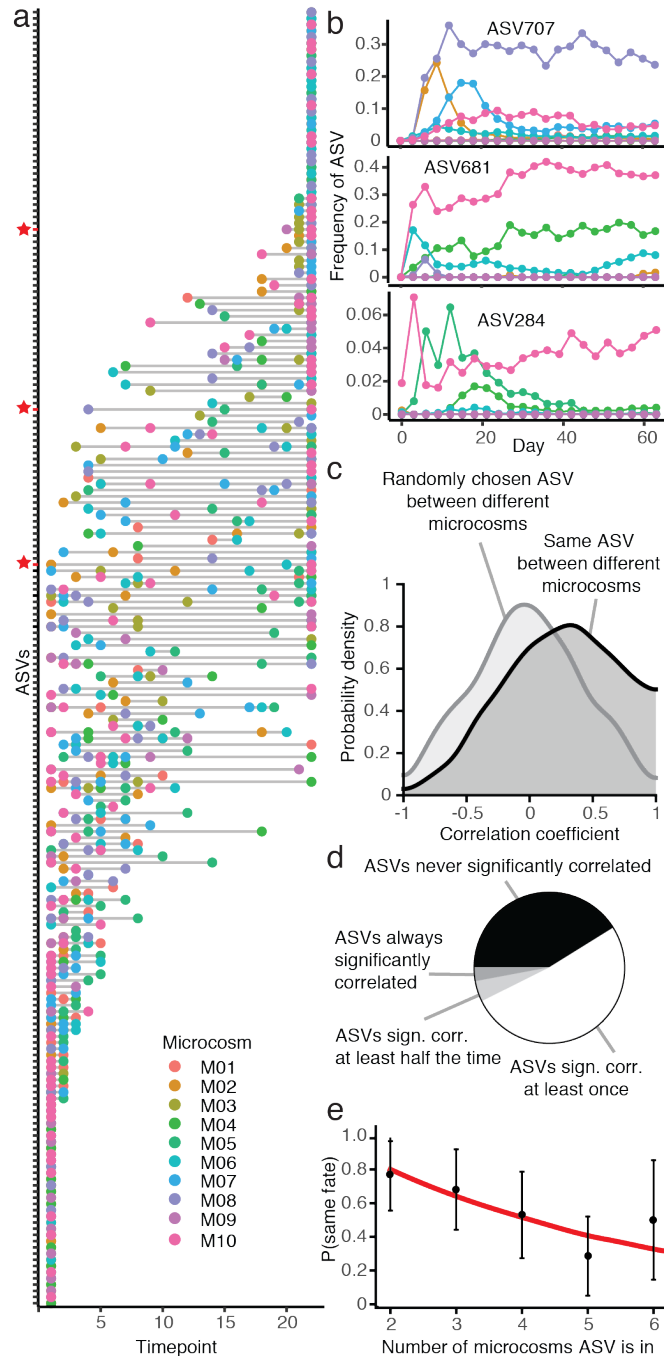

**Figure 3.** Species dynamics are context dependent. a) The y-axis lists all ASVs shared by at least two microcosms. Colored points mark which day the ASV was lost from that particular microcosm. Points at the far right of the graph are ASVs that persisted to the end of the serial transfer experiment. Red stars mark the ASVs shown in panel b. b) Three examples of ASV dynamics in the different microcosms over time, where ASVs were lost early in some microcosms but persisted until the end in others. c) Probability density of correlation coefficients for the correlation between the same ASVs in different microcosms versus randomly chosen ASVs. d) Pie chart showing proportions of ASVs that are never, at least once, at least half of the time or always significantly correlated in different microcosms. e) Probability of ASVs having the same fate (either persisting or going extinct) in different microcosms depending on the number of microcosms they are present in. Red line shows null expectation (see Methods).

186 We found that the effects of historical contingency on community assembly were  
 187 remarkably consistent and reproducible. We performed the same experiment on a second set of  
 188 microcosms from the same inocula that were not subjected to initial filtering, but otherwise  
 189 underwent the same transfer protocol and amplicon sequencing. However, despite likely

190 differences in protozoan predation (particularly for microcosms M02, M05 and M06 where  
191 observed activity persisted for at least 15 days), the unfiltered and filtered microcosm bacterial  
192 communities followed the same trajectories in community composition (see NMDS plot of Bray-  
193 Curtis dissimilarities, Supplementary Figure S2). The effects of initial pitcher source  
194 environment and composition persisted and were reproducible across both our filtered and  
195 unfiltered samples.

196

### 197 **ASV composition is highly correlated with substrate utilization**

198       Functional redundancy is thought to be widespread in regional pools of bacteria<sup>34</sup>, and  
199 thus communities can have diverse compositions but converge to similar functional activity.  
200 Previous studies have generally found stronger convergence in function than in composition, and  
201 this was a likely outcome from our experiment as all microcosms experienced the same  
202 environment in terms of nutrients, temperature and light. In agreement with this, carbon dioxide  
203 production, as measured with the MicroResp system, was highly variable across the different  
204 microcosms for the first measurement (Day 0 – 3), but then quickly converged to a similar level  
205 (Figure 4a). After Day 3, communities could not be reliably distinguished based on their CO<sub>2</sub>  
206 output. The low variation among microcosms in percent CO<sub>2</sub> suggests that the bacterial  
207 communities were respiring at about the same rate.

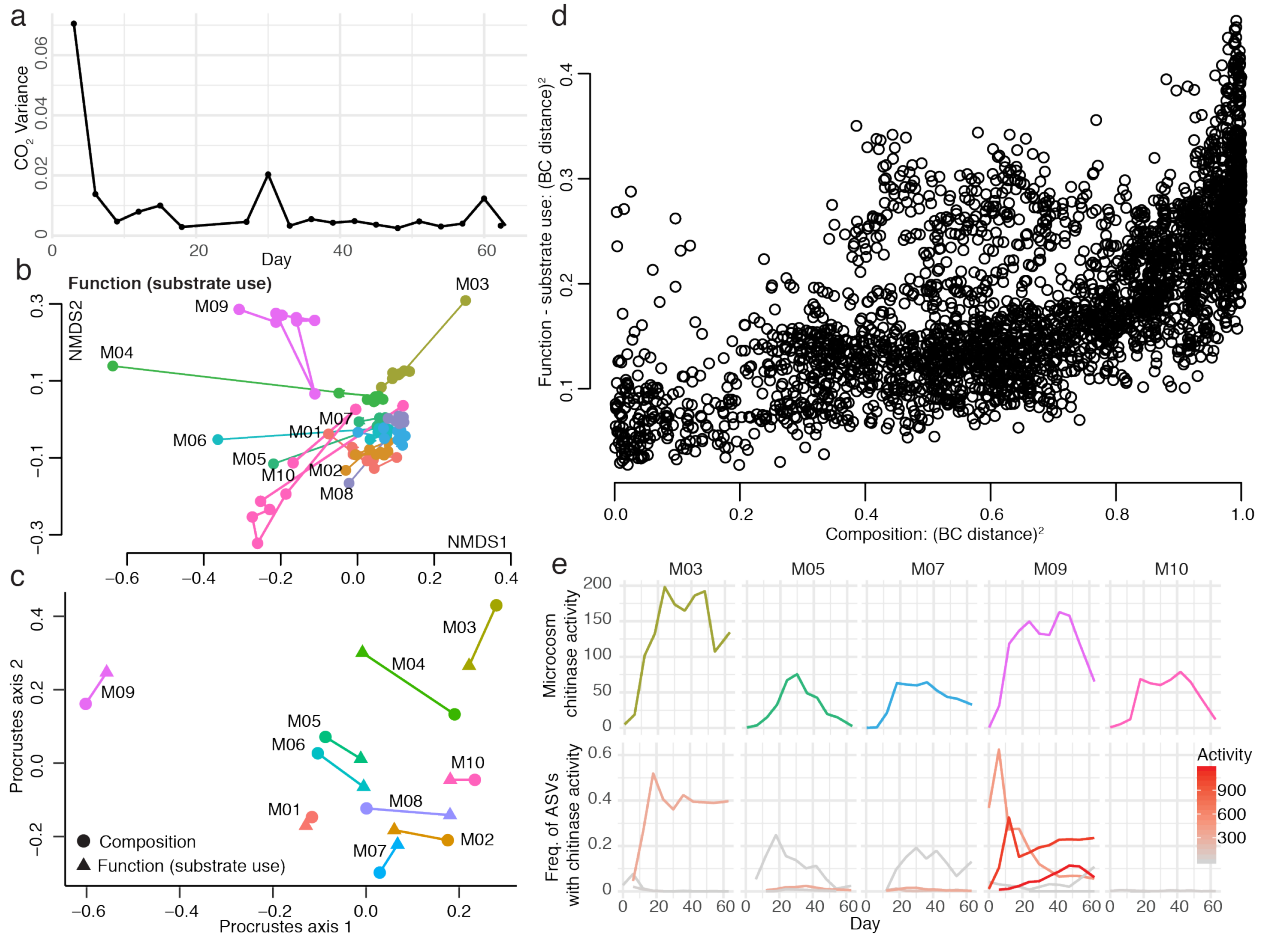

**Figure 4.** Community composition strongly correlates with functional activity. a) Variance in percent CO<sub>2</sub> among the ten microcosms over the course of the serial transfer experiment. b) NMDS plot of the Bray-Curtis dissimilarities of functional activity (substrate use) as measured by EcoPlates. c) Procrustes rotation of the composition NMDS plot with the function NMDS plot for Day 63 (Procrustes correlation = 0.8991,  $p < 0.001$ ). d) Plot of Bray-Curtis dissimilarities for composition by function (Mantel test  $r = 0.6403$ ,  $p < 0.001$ ), squared to better illustrate the spread of points. e) Endochitinase activity over time for the five microcosms that strains were cultured from (top row) and frequency of the ASVs over time that map to strains with measurable endochitinase activity (bottom row). Endochitinase activity is shown in units/mL for the strains/ASVs in the bottom row by a gradient from grey (low activity) to red (high activity).

208 In contrast with CO<sub>2</sub> production and the expectation of functional convergence, the  
 209 stabilized microcosm communities showed clear differences in substrate use, as measured across  
 210 31 substrates with Biolog EcoPlates (Supplementary Figure S3, Figure 4b and 4c). For example,  
 211 M09 was the only community able to metabolize 2-Hydroxybenzoic acid (salicylic acid) but  
 212 unable to metabolize itaconic acid. When plotting an NMDS ordination of Bray-Curtis

213 dissimilarities based on EcoPlate functional measures (Figure 4b) we found a very similar  
214 pattern as with species composition: functional activity undergoes an initial large shift and  
215 becomes more similar, yet remains distinct across microcosms. A Procrustes test comparing the  
216 NMDS plots of composition and function at the end of the experiment recovers a strong and  
217 highly significant correlation:  $0.8991$ ,  $p < 0.001$  (Figure 4c). Furthermore, when comparing  
218 composition to function across all days and samples using Bray-Curtis dissimilarities, samples  
219 with similar composition generally also had similar functional activity (Figure 4d), and are  
220 strongly correlated in a Mantel test ( $r = 0.6403$ ,  $p < 0.001$ ). The correlation is in fact higher when  
221 only comparing the final day's measurements ( $r = 0.6907$ ,  $p < 0.001$ ). To profile the hydrolytic  
222 activity of the community, we focused on the activity of chitinases – the enzymes that degrade  
223 chitin – since chitin is the main component of insect exoskeletons and is a key carbon and  
224 nitrogen source in the pitcher plant system. The chitin hydrolysis rate of the community  
225 supernatant was also highly variable across microcosms, with M03 and M09 having the highest  
226 measures of endochitinase activity (Figure 4e). In summary, microcosm communities begin with  
227 different compositions as a result of historical contingencies affecting individual pitchers. These  
228 compositions shift as bacterial communities are brought into a new laboratory environment, but  
229 remain influenced by their starting compositions (Figure 5, part i). We expected to see functional  
230 convergence (ii), since all communities were grown for many generations in the same  
231 environment, but instead communities retained functional differences that were correlated with  
232 their compositions (iii).

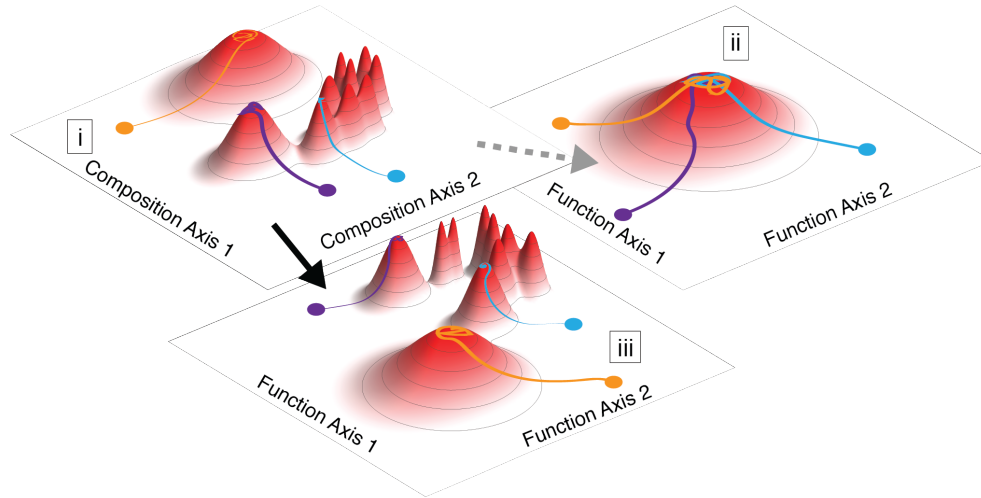

Figure 5. Microcosms with the same environmental conditions assemble communities with distinct equilibria due to historical contingencies (i). Function is often expected to converge in a common environment (ii), but our results show key functional differences are maintained by communities of different compositions (iii).

233 We developed an isolate collection to learn more about the mechanisms underpinning the  
234 strong differences in substrate utilization and hydrolytic activity across microcosms. By testing  
235 the enzymatic activity and substrate metabolism of individual isolates, we hypothesized we could  
236 identify bacterial strains responsible for the corresponding community function. We successfully  
237 isolated 350 strains and sequenced their full 16S rRNA genes. Of these, 176 mapped with 100%  
238 identity to 33 different ASVs from the amplicon sequencing. For the five microcosms we  
239 cultured from, 14 out of the combined top 15 ASVs (in terms of relative abundance) on Day 63  
240 matched perfectly with cultured strains, as did 5-7 of the top 10 ASVs per microcosm. Our  
241 cultured strains had broad representation across different taxonomic groups (Supplementary file).

242 Consistent with our hypothesis, the chitinase activity of our cultured strains mirrored  
243 microcosm activity: strains from M03 and M09 had the highest endochitinase activity out of all  
244 measured strains. The activity of individual strains/ASVs mapped well to the activity of the

245 entire microcosms, where M03 and M09 were also highest (Figure 4e). In M03 only one of the  
246 measured strains showed high activity (ASV589, a *Chromobacterium* species), while in M09 at  
247 least three strains had high endochitinase activity (ASV018 *Chromobacterium*, ASV842 *Dyella*,  
248 and ASV863 *Burkholderia*). Interestingly, the strains with the highest chitinase activity also had  
249 high protease activity, and all except for ASV842 had high lipase activity (Supplementary Figure  
250 S4), suggesting that these bacteria are generally good at degrading complex substrates.

251 To ask to what extent the pattern of substrate utilization of the community could be  
252 reduced to the substrate utilization of its members, we applied the same Biolog EcoPlates test to  
253 the individual isolates. We found that substrate utilization differences between communities  
254 could be attributed to differences in species abundance. Out of the 20 strains measured using  
255 Biolog EcoPlates, only one showed high metabolic activity when grown with salicylic acid  
256 (strain M09D5GC17 corresponding to ASV863 *Burkholderia*), and it was a strain present only in  
257 M09 which was the only microcosm where growth on salicylic acid was observed. Conversely,  
258 the strain with the most growth on itaconic acid (strain M10D5GC19 corresponding to ASV140  
259 *Achromobacter*) was present at the final timepoint in all the microcosms we cultured from except  
260 for M09, and the M09 community was the only one not able to grow on itaconic acid  
261 (Supplementary Figure S5). Individual strains thus drive key functional differences among  
262 microcosms, and we were able to culture and analyze a set of these strains—connecting  
263 genotypes with their functional phenotypes.

264  
265

## 266 **Discussion**

267 The effects of historical contingencies are difficult to isolate and detect in the field,  
268 because even adjacent sites can experience distinct environmental conditions. The effects can be



269 difficult to capture in a laboratory as well, because historical contingencies may only affect  
270 community assembly when disturbance is low and environmental selection is weak<sup>2,12,35</sup> and  
271 these conditions are rarely met when natural communities are moved into laboratory settings.  
272 Our study demonstrates that historical contingency strongly influences community assembly in a  
273 realistic, but controlled, laboratory environment. Moreover, the effects of historical contingency  
274 are persistent and reproducible, suggesting that, with enough information about species'  
275 functional capabilities, responses to environmental conditions, and interactions with other  
276 species, community assembly dynamics might be predictable.

277         We find the dynamics of individual ASVs affected key functional measures and were  
278 influenced by community context; likely driven by interactions among species within  
279 microcosms. For example, priority effects may have played a role, with early colonizers altering  
280 growth conditions for other species. Microcosm communities remained different in richness and  
281 in composition, despite an initial shift when assembling in a constant *in vitro* environment.  
282 Surprisingly, strong differences also remained in terms of relevant functional activity and  
283 function was highly correlated with composition in our study. These results suggest that species  
284 across the microcosm communities were not functionally redundant with regard to the relevant  
285 substrate degradation capabilities of this system. Redundancy in bacterial functional roles has  
286 been suggested as an explanation for the high complexity of microbial communities, and as a  
287 buffer that increases stability in the face of perturbation<sup>34,36</sup>. This study highlights how specific  
288 and relevant functional measures should be examined more closely in microbial ecology,  
289 because a general lack of redundancy in key functions could influence both the carbon flux and  
290 the overall stability of an ecosystem.

291           Our conceptual model for the assembly dynamics of microcosms suggests that when in  
292 the same *in vitro* environment, non-metabolically active species are quickly pruned, and after  
293 only one transfer the final diversity of the community is determined. This result implies that  
294 historical contingencies influence richness levels, even after communities equilibrate to a  
295 common environment. Despite differences in richness and composition across microcosms,  
296 temporal dynamics of ASV extinction follow the same processes, likely driven by external  
297 factors in the transfer process rather than the biotic context. However, ASVs persisting within the  
298 microcosms are largely influenced by microcosm context, indicating significant effects of  
299 species interactions. Therefore, long-lasting effects of early conditions and biota lead to strong  
300 differences in final community composition and ecosystem function. The environmental  
301 conditions of our experiment supported multiple functional outcomes, which may have shifted  
302 the selective balance to species interactions, therefore increasing the possible community states.  
303 Our experiment was necessarily run in the laboratory, but it used wild communities as the  
304 starting point and suggests potential implications for a natural system. Stochastic events during  
305 colonization of the pitchers of carnivorous pitcher plants may have lasting impacts on the ability  
306 of the pitcher microbiome to degrade insect prey and to release nutrients such as nitrogen and  
307 phosphorus to the common pitcher pool in a plant-accessible form.

308           Our model system based on pitcher plant bacterial communities can be used to address  
309 other questions in microbial ecology. For example: the role of dispersal in community assembly;  
310 how coalescence events (the mixing of stable communities) lead to different compositions; how  
311 invasions alter community structure and function; and how evolution acts on individuals within  
312 communities to change interactions over time. Our microcosms are less complex than most  
313 natural systems because species that did not grow within the current environment were pruned

314 during transfers, but are more complex than almost all experimental laboratory communities. The  
315 ability to culture key community members provides the opportunity for building synthetic  
316 communities that retain interactions among species previously established in nature.  
317

## 318 **Methods**

### 319 **Sample collection**

320 We collected the entire aquatic pools from 10 healthy pitchers of *Sarracenia purpurea*  
321 pitcher plants at Harvard Pond (Harvard Forest, MA) in September, 2017. We used sterile,  
322 single-use pipettes to remove the samples into sterile 15 mL tubes. The samples were transported  
323 in a cooler on ice to the laboratory where they were refrigerated overnight. The following  
324 morning, we set up the experiment.

325

### 326 **Serial transfer experiment**

327 We filtered half of each sample through 3  $\mu\text{m}$  syringe filters to focus on the bacterial  
328 component of the community. From both the filtered and unfiltered components of each sample,  
329 we combined 500  $\mu\text{L}$  of pitcher fluid with 500  $\mu\text{L}$  of media in a 48-well plate. In order to have a  
330 complex nutrient source similar to what bacteria from pitcher plant fluids would experience in  
331 their native environment, we used cricket media (3 grams cricket powder from farmed *Acheta*  
332 *domestica* crickets per 1 Liter of milliQ-purified water, acidified to pH 5.6 and then autoclaved).  
333 The plate was then placed in a 25°C incubator. After three days of incubation, each sample was  
334 mixed well and 500  $\mu\text{L}$  was transferred to a new plate with 500  $\mu\text{L}$  of sterile cricket media. From  
335 our calculations, we added the equivalent of about 1/60<sup>th</sup> of a cricket to every well at each  
336 transfer. We continued transferring samples and adding cricket media in a 1:1 ratio every three  
337 days for a total of 21 plates over 63 days.

338 At the beginning of the experiment (Day 0), we removed a portion of each sample to  
339 freeze at -80°C for later DNA extraction and amplicon sequencing. We removed 100  $\mu\text{L}$  of each  
340 filtered sample to first measure optical density (OD) at 600 nm, and then used a Fluorimetric

341 Chitinase Assay Kit (Sigma-Aldrich) to measure the activity of three different types of  
342 chitinases: endochitinases, chitobiosidases and  $\beta$ -N-acetylglucosaminidases. We bead-beat each  
343 sample for 1 minute and centrifuged it before using a portion of the supernatant in the assay, with  
344 two replicates for each sample. Our downstream analyses focused on endochitinases, the  
345 enzymes that cleave intramolecular bonds forming new chain ends.

346 We also measured a “functional fingerprint” of the communities with Biolog EcoPlates<sup>37</sup>.  
347 We diluted each sample 1:10, combining 1 mL of each filtered sample with 9 mL of purified  
348 water that had been acidified to pH 5.6 and then autoclaved. We filled each EcoPlate well with  
349 100  $\mu$ L of sample, and incubated the plates in the 25°C incubator for three days. At the end of  
350 this time the plate was read in a plate reader according to EcoPlate instructions.

351 In addition to measuring chitinase and EcoPlate activity, we measured CO<sub>2</sub> production  
352 with the MicroResp system<sup>38</sup>. We added 250  $\mu$ L of each filtered sample to 250  $\mu$ L of cricket  
353 media in three replicates for each sample in a deepwell plate, attached a detector plate with the  
354 MicroResp seal and clamp, and incubated at 25°C for three days before measuring the resulting  
355 color change in the detector plate at 570 nm. We calibrated the MicroResp measurements  
356 according to the manual by incubating the detector medium with known CO<sub>2</sub> concentrations and  
357 making a reference curve.

358 At each transfer, we repeated the MicroResp measurement and froze a portion of the  
359 culture at -80°C for later DNA extraction. Every second transfer, we repeated the chitinase  
360 activity measurements, and every third transfer we repeated the Biolog EcoPlates with a 1:40  
361 dilution to reduce carry over of any remaining cricket medium. All measurements after the first  
362 sets were done without replicates. During the course of the experiment, some of the MicroResp

363 indicator plates showed evidence of fungal contamination; measurements involving affected  
364 wells were removed from our analyses.

365 On the final day (Day 63) of the experiment, we repeated all functional measurements,  
366 cultured five of the ten microcosm communities in order to isolate strains, and froze 100  $\mu$ L of  
367 each community in 40% glycerol solution and the remaining culture at -80 °C.

368

### 369 **DNA extraction and sequencing**

370 DNA was extracted from all samples with the Agencourt DNAdvance kit (Beckman  
371 Coulter) using 100  $\mu$ L per sample. In each 96-well extraction plate we included negative  
372 controls. DNA was quantified with the Quant-iT PicoGreen dsDNA Assay kit (Invitrogen) on a  
373 plate reader, before being sent to the Environmental Sequencing Facility at Argonne National  
374 Laboratory for amplicon sequencing on a MiSeq targeting the V4 region of 16S rRNA using the  
375 same 515F and 806R primers as the Earth Microbiome Project  
376 (<http://press.igsb.anl.gov/earthmicrobiome/protocols-and-standards/16s/>). Sequence data has  
377 been deposited in the NCBI Sequence Read Archive (SRA) under Project ID PRJNA559886.

378

### 379 **Amplicon sequence analysis**

380 On the MIT Engaging computing cluster, we used QIIME2 version 2018.4<sup>39</sup> to  
381 demultiplex our sequences, and the DADA2<sup>40</sup> plugin to denoise sequences and to generate  
382 Amplicon Sequence Variants (ASVs) of ~250 base pairs in length. We retained all ASVs with  
383 more than two sequences across all samples. We assigned taxonomy using the classify-sklearn  
384 method which is a Naive Bayes classifier, and a pre-trained classifier made with the Greengenes  
385 database, version 13\_8.

386 Statistical analyses were performed and graphs were generated in R and Mathematica.  
387 Reads for each ASV were normalized by the total amount of reads in each sample. Bray-Curtis  
388 dissimilarities and NMDS ordinations for Figure 1 were performed using the R *vegan* package<sup>41</sup>.  
389 The effective number of species was calculated as  $\exp(\text{Shannon index})$ . Richness for Figure 2  
390 was calculated counting all ASVs present at later time points in each microcosm as present at  
391 previous time points to account for ASVs below the sequencing detection limit. Richness of  
392 early timepoints (Days 0 and 3) were correlated with that of the final timepoint (Day 63) using  
393 linear regression. We used additional R packages, including *plyr*, *ggplot2*, *reshape2*, *dendextend*,  
394 and *biclust*. R code and data tables are available via the Harvard Dataverse:  
395 <https://dataverse.harvard.edu/privateurl.xhtml?token=69114952-e9e3-469d-844d-7e3c70380cd0>.

396

### 397 **Null model for community assembly**

398 To describe the dynamics of ASV loss, we employed a geometric model, i.e., the  
399 probability  $P(t)$  of an ASV that goes extinct eventually to go extinct at transfer  $t$  is equal to the  
400 probability that it did not go extinct in the preceding  $t - 1$  transfer. That is,

$$401 \quad P(t) = p(1 - p)^{t-1},$$

402 Where  $p$  is the sole parameter of the model. It can be shown that the maximum likelihood  
403 estimator of  $p$  is given by the mean time to extinction, i.e.,  $\hat{p} = 1/\langle t \rangle$ . To determine whether the  
404 extinction time distributions are best described by a single parameter  $p$  or whether individual  
405 parameters for each microcosm are needed, we computed the Akaike Information Criterion  $\mathcal{A}$   
406 from the likelihood  $\mathcal{L}$  of the observed extinction under the geometric model, using either a single  
407 parameter  $p$  given by the inverse of the mean extinction time for all ASVs across all  
408 microcosms, or for each microcosm individually, i.e.,

409  $\mathcal{A}_k = 2k - \mathcal{L}(\text{data}|\{p\}_k),$

410 where  $k$  is either 1 (for a common parameter) or 10 (for individual parameters). We found

411  $\mathcal{A}_1 = 2183, \mathcal{A}_{10} = 2197$ , such that the relative likelihood of the common-parameter model over

412 the individual-parameter model was  $e^{(\mathcal{A}_1 - \mathcal{A}_{10})/2} \approx 1000$ .

413

#### 414 **Correlation analysis**

415 For the correlation analysis in Fig. 3c-e, ASV abundances were first center-log

416 transformed after removal of absent ASVs. One pseudo-read was added to account for ASV

417 abundances below the detection threshold. Standard Pearson correlation coefficients were then

418 computed using the transformed time series. For Fig. 3c, we computed the correlation

419 coefficients of time series of the same ASV in different microcosms and compared them to

420 correlations between randomly chosen ASVs in different microcosms. For Supplementary Fig.

421 correlation between pairs of strains, we computed correlations between pairs of strains that co-

422 occurred in more than one microcosm and compared to randomly chosen pairs.

423

#### 424 **Null model for an ASV having the same fate in multiple microcosms**

425 For Fig. 3e, we classified the fate (either extinction or persistence) of individual ASVs

426 shared between microcosms. We found that  $f = 80\%$  of strains occurring in two microcosms had

427 the same fate in both, suggesting that a given strain has an 80% chance of having the same fate in

428 a new microcosm as it had in its current microcosm. We thus estimate the probability  $P(n)$  of a

429 similar strain occurring in  $n$  microcosms to have the same fate in all  $n$  microcosms as  $P(n) =$

430  $f^{n-1}$ , which is shown as the red line in Fig. 3e.

431



## 432 **Strain isolation and identification**

433 Individual strains were isolated from five of the ten microcosms (M03, M05, M07, M09  
434 and M10) by plating the culture fluid and picking around 100 colonies per microcosm. We  
435 cultured on petri plates at 1:10<sup>5</sup> and 1:10<sup>6</sup> dilutions using both cricket media with the addition of  
436 agar and a second medium containing 11.28 g/L M9 salts, vitamin solution<sup>42</sup>, trace metals<sup>43</sup>,  
437 agar, and 2.5 g/L N-acetylglucosamine (GlcNAc) as the sole carbon source. Plates were put in a  
438 25°C incubator for one week, after which single colonies were picked and then re-streaked at  
439 least two additional times before being grown up in liquid media and frozen in glycerol at -80°C.

440 To identify and barcode our strains, we added 2 µL of liquid culture to 20 µL of sterile,  
441 nuclease free water and, after a freeze-thaw cycle, did direct PCR using primers 27F and 1492R  
442 to amplify the 16S ribosomal RNA gene and the Q5 High-Fidelity kit (New England Biolabs)  
443 with an initial 5-minute incubation at 100°C. Before Sanger sequencing, we tested for successful  
444 amplification with gel electrophoresis and cleaned the PCR products with SPRI beads according  
445 to the Agencourt AMPure XP protocol. Sanger sequences were trimmed and filtered with  
446 Geneious, and assigned taxonomy using the RDP classifier.

447

## 448 **Measurements of strain functional activity**

449 We measured the functional activity of approximately 50 strains with 100% matches in  
450 their Sanger-sequenced 16S rRNA gene to ASVs from the amplicon sequencing. When multiple  
451 strains mapped to the same ASV, their enzyme activities were averaged. Each strain was  
452 streaked out on cricket-M9 media plates from the frozen glycerol stock, and then a single colony  
453 was grown in liquid cricket media. Chitinase activity was measured as described for the  
454 microcosm communities, and for Figure 4e strains were considered to be active above a cutoff of

455 1 unit/mL. Protease and lipase activities were also measured using the Sigma-Aldrich Protease  
456 Fluorescent Detection Kit and Lipase Activity Assay Kit III. Seventeen of the strains were put  
457 into EcoPlates to compare their metabolic activity on the 31 substrates to that of their source  
458 communities.

459

460

461 **Acknowledgements:**

462 We thank Jose Saavedra for help with sampling, Lei Ma and Peter Duff for laboratory assistance,  
463 and Veda Khadka for contributing R code. This work was made possible by NSF-BSF grant  
464 DEB 1655983 and European Research Council grant 640384 under the European Union's  
465 Horizon 2020 research and innovation program. LSB was supported by a James S. McDonnell  
466 Foundation Postdoctoral Fellowship, MG was supported by the Simons Foundation Award  
467 599207 and G.E.L. was supported by the Human Frontiers Science Program grant  
468 LT000643/2016-L.

469 References:

- 470 1. Nemergut, D. R. *et al.* Patterns and Processes of Microbial Community Assembly. *Microbiol*  
471 *Mol Biol Rev* **77**, 342–356 (2013).
- 472 2. Chase, J. M. Community assembly: when should history matter? *Oecologia* **136**, 489–498  
473 (2003).
- 474 3. Fukami, T. Historical Contingency in Community Assembly: Integrating Niches, Species  
475 Pools, and Priority Effects. *Annu. Rev. Ecol. Evol. Syst.* **46**, 1–23 (2015).
- 476 4. Drake, J. A. Community-Assembly Mechanics and the Structure of an Experimental Species  
477 Ensemble. *Am. Nat.* **137**, 1–26 (1991).
- 478 5. Seth, E. C. & Taga, M. E. Nutrient cross-feeding in the microbial world. *Front. Microbiol.* **5**,  
479 (2014).
- 480 6. Datta, M. S., Sliwerska, E., Gore, J., Polz, M. F. & Cordero, O. X. Microbial interactions  
481 lead to rapid micro-scale successions on model marine particles. *Nat. Commun.* **7**, (2016).
- 482 7. Goldford, J. E. *et al.* Emergent simplicity in microbial community assembly. *Science* **361**,  
483 469–474 (2018).
- 484 8. Shaani, Y., Zehavi, T., Eyal, S., Miron, J. & Mizrahi, I. Microbiome niche modification  
485 drives diurnal rumen community assembly, overpowering individual variability and diet  
486 effects. *ISME J.* **12**, 2446–2457 (2018).
- 487 9. Long, R. A. & Azam, F. Antagonistic Interactions among Marine Pelagic Bacteria. *Appl.*  
488 *Environ. Microbiol.* **67**, 4975–4983 (2001).
- 489 10. Schink, B. Energetics of Syntrophic Cooperation in Methanogenic Degradation.  
490 *MICROBIOL MOL BIOL REV* **61**, 19 (1997).

- 491 11. Beisner, B. E., Haydon, D. T. & Cuddington, K. Alternative stable states in ecology. *Front.*  
492 *Ecol. Environ.* **1**, 376–382 (2003).
- 493 12. Chase, J. M. Drought mediates the importance of stochastic community assembly. *Proc.*  
494 *Natl. Acad. Sci.* **104**, 17430–17434 (2007).
- 495 13. Verdú, M. & Pausas, J. G. Fire drives phylogenetic clustering in Mediterranean Basin woody  
496 plant communities. *J. Ecol.* **95**, 1316–1323 (2007).
- 497 14. Fukami, T. *et al.* Assembly history dictates ecosystem functioning: evidence from wood  
498 decomposer communities. *Ecol. Lett.* **13**, 675–684 (2010).
- 499 15. Körner, C., Stöcklin, J., Reuther-Thiébaud, L. & Pelaez-Riedl, S. Small differences in arrival  
500 time influence composition and productivity of plant communities. *New Phytol.* **177**, 698–  
501 705 (2008).
- 502 16. Fukami, T., Bezemer, T. M., Mortimer, S. R. & Putten, W. H. van der. Species divergence  
503 and trait convergence in experimental plant community assembly. *Ecol. Lett.* **8**, 1283–1290  
504 (2005).
- 505 17. Kunin, V. *et al.* Millimeter-scale genetic gradients and community-level molecular  
506 convergence in a hypersaline microbial mat. *Mol. Syst. Biol.* **4**, 198 (2008).
- 507 18. Burke, C., Steinberg, P., Rusch, D., Kjelleberg, S. & Thomas, T. Bacterial community  
508 assembly based on functional genes rather than species. *Proc. Natl. Acad. Sci.* **108**, 14288–  
509 14293 (2011).
- 510 19. Louca, S. *et al.* High taxonomic variability despite stable functional structure across  
511 microbial communities. *Nat. Ecol. Evol.* **1**, 0015 (2016).
- 512 20. The Human Microbiome Project Consortium *et al.* Structure, function and diversity of the  
513 healthy human microbiome. *Nature* **486**, 207–214 (2012).

- 514 21. Enke, T. N., Leventhal, G. E., Metzger, M., Saavedra, J. T. & Cordero, O. X. Microscale  
515 ecology regulates particulate organic matter turnover in model marine microbial  
516 communities. *Nat. Commun.* **9**, 2743 (2018).
- 517 22. Rivett, D. W. & Bell, T. Abundance determines the functional role of bacterial phylotypes in  
518 complex communities. *Nat. Microbiol.* **3**, 767 (2018).
- 519 23. Kitching, R. L. *Food Webs and Container Habitats: The Natural History and Ecology of*  
520 *Phytotelmata*. (Cambridge University Press, 2000).
- 521 24. Adlassnig, W., Peroutka, M. & Lendl, T. Traps of carnivorous pitcher plants as a habitat:  
522 composition of the fluid, biodiversity and mutualistic activities. *Ann. Bot.* **107**, 181–194  
523 (2010).
- 524 25. Bradshaw, W. E. & Creelman, R. A. Mutualism between the Carnivorous Purple Pitcher  
525 Plant and its Inhabitants. *Am. Midl. Nat.* **112**, 294–304 (1984).
- 526 26. Butler, J. L., Gotelli, N. J. & Ellison, A. M. Linking the Brown and Green: Nutrient  
527 Transformation and Fate in the *Sarracenia* Microecosystem. *Ecology* **89**, 898–904 (2008).
- 528 27. Armitage, D. W. Linking the development and functioning of a carnivorous pitcher plant's  
529 microbial digestive community. *ISME J.* **11**, 2439–2451 (2017).
- 530 28. Bittleston, L. S. *et al.* Convergence between the microcosms of Southeast Asian and North  
531 American pitcher plants. *eLife* **7**, e36741 (2018).
- 532 29. Spear, J. B., Fuhrer, J. & Kirby, B. D. *Achromobacter xylosoxidans* (Alcaligenes  
533 *xylosoxidans* subsp. *xylosoxidans*) bacteremia associated with a well-water source: case  
534 report and review of the literature. *J. Clin. Microbiol.* **26**, 598–599 (1988).

- 535 30. Han, J. *et al.* Characterization of a novel plant growth-promoting bacteria strain Delftia  
536 tsuruhatensis HR4 both as a diazotroph and a potential biocontrol agent against various plant  
537 pathogens. *Syst. Appl. Microbiol.* **28**, 66–76 (2005).
- 538 31. Lau, H.-T., Faryna, J. & Triplett, E. W. *Aquitalea magnusonii* gen. nov., sp. nov., a novel  
539 Gram-negative bacterium isolated from a humic lake. *Int. J. Syst. Evol. Microbiol.* **56**, 867–  
540 871 (2006).
- 541 32. Willems, A. & De Vos, P. *Comamonas*. in *The Prokaryotes* (eds. Dworkin, M., Falkow, S.,  
542 Rosenberg, E., Schleifer, K.-H. & Stackebrandt, E.) 723–736 (Springer New York, 2006).  
543 doi:10.1007/0-387-30745-1\_31
- 544 33. Ramette, A. *et al.* *Pseudomonas protegens* sp. nov., widespread plant-protecting bacteria  
545 producing the biocontrol compounds 2,4-diacetylphloroglucinol and pyoluteorin. *Syst. Appl.*  
546 *Microbiol.* **34**, 180–188 (2011).
- 547 34. Louca, S. *et al.* Function and functional redundancy in microbial systems. *Nat. Ecol. Evol.* **2**,  
548 936 (2018).
- 549 35. Pagaling, E. *et al.* Community history affects the predictability of microbial ecosystem  
550 development. *ISME J.* **8**, 19–30 (2014).
- 551 36. Naeem, S. & Li, S. Biodiversity enhances ecosystem reliability. *Nature* **390**, 507 (1997).
- 552 37. Choi, K.-H. & Dobbs, F. C. Comparison of two kinds of Biolog microplates (GN and ECO)  
553 in their ability to distinguish among aquatic microbial communities. *J. Microbiol. Methods*  
554 **36**, 203–213 (1999).
- 555 38. Campbell, C. D., Chapman, S. J., Cameron, C. M., Davidson, M. S. & Potts, J. M. A Rapid  
556 Microtiter Plate Method To Measure Carbon Dioxide Evolved from Carbon Substrate

- 557        Amendments so as To Determine the Physiological Profiles of Soil Microbial Communities  
558        by Using Whole Soil. *Appl. Environ. Microbiol.* **69**, 3593–3599 (2003).
- 559    39. Bolyen, E. *et al.* *QIIME 2: Reproducible, interactive, scalable, and extensible microbiome*  
560        *data science.* (PeerJ Inc., 2018). doi:10.7287/peerj.preprints.27295v2
- 561    40. Callahan, B. J. *et al.* DADA2: High-resolution sample inference from Illumina amplicon  
562        data. *Nat. Methods* **13**, 581–583 (2016).
- 563    41. Oksanen, J. *et al.* *vegan: Community Ecology Package.* (2018).
- 564    42. Finster, K., Tanimoto, Y. & Bak, F. Fermentation of methanethiol and dimethylsulfide by a  
565        newly isolated methanogenic bacterium. *Arch. Microbiol.* **157**, 425–430 (1992).
- 566    43. Tibbles, B. J. & Rawlings, D. E. Characterization of nitrogen-fixing bacteria from a  
567        temperate saltmarsh lagoon, including isolates that produce ethane from acetylene. *Microb.*  
568        *Ecol.* **27**, (1994).
- 569  
570
